# Supplementary material
Source: PubMed Central journal article supplement (PMC3243794)
Supplement: NIHMS335484-supplement-Supp_Fig_S1-S3.pdf [file NIHMS335484-supplement-Supp_Fig_S1-S3.pdf]

## **Supporting Information**

### **Immunocytochemistry**

Primary cortical neurons grown on glass coverslips were fixed by 4% paraformaldehyde (PFA) in PBS for 15 min, washed with PBS 3 times, and subsequently permeabilized with 0.1% Triton X-100 (Sigma) in PBS. The cells were incubated with Rabbit anti-hPBEF (1:300, Bethyl Laboratories) and Mouse anti-MAP2 (1:300, Millipore) overnight at 4°C. The cells were then incubated with secondary antibodies conjugated with either FITC or Rhodamine (1:100, Chemicon) for 4 h at RT and counterstained with DAPI to label nuclei. Fluorescent images were taken by a Nikon FN1 epi-fluorescence microscopy (Nikon, NY, USA) equipped with a CoolSNAP-EZ CCD-camera (Photo-metrics, Tucson, AZ, USA).

### **Intracellular NAD<sup>+</sup> assay**

The concentration of NAD<sup>+</sup> was measured in a similar way as previously described (Zhang et al. 2010) using NAD<sup>+</sup> assay kit according to the manufacturer's instructions (Bioassay Systems, Hayward, CA, USA). Cortical neurons cultured in a 6-well culture plate (~10<sup>6</sup> cells in each well) were washed with cold PBS for 2 times. Then the freshly harvested cortical neurons were placed into a 1.5 mL tube with a 100 µL NAD<sup>+</sup> extraction buffer and were homogenized. The extracts were heated at 60°C for 5 min, and 20 µL assay and 100 µL opposite extraction buffers were added to neutralize the extracts. The samples were briefly mixed, then spun down at 14,000 r.p.m. for 5 min. The supernatant was used for an NAD<sup>+</sup> enzymatic assay according to the manufacturer's instructions. The NAD<sup>+</sup> concentration was obtained from calibration curve using standard NAD<sup>+</sup> from the kit; NAD<sup>+</sup> content was expressed as a percentage of the value from the control group.

### **Intracellular ATP assay**

The concentration of ATP was measured using an ATP assay kit (Bioassay Systems, CA, USA). Briefly, neurons cultured in a 6-well plate were washed with PBS and lysed by a lysis buffer. Each sample was placed into 1.5 mL tubes, sonicated and spun down at 14,000 r.p.m. for 5 min. The supernatant was used for ATP assay according to the manufacturer's instructions for a Fluoroskan Ascent FL luminometer (Thermo Scientific). The ATP concentration was obtained from a calibration curve using standard ATP from the kit; ATP content was expressed as a percentage of the value from control group.

### **Transient transfection of neuronal cell cultures**

Neurons cultured on glass coverslips were transfected with DNA plasmids with a CAGGS promoter (pCAGGS) encoding EGFP, wild type (WT) and mutant hPBEF (i.e., H247A and H247E) cDNAs using Lipofectamine<sup>TM</sup> 2000 (Cat#11668-019, Invitrogen), according to the manufacturer's specifications. Neurons expressing WT or mutant hPBEFs were identified with cotransfection of EGFP using a fluorescent microscope. For one well in a 24-well plate, 0.8 µg of WT, or mutant hPBEF DNA plasmid, and 0.8 µg of EGFP DNA plasmid were mixed with 50 µL antibiotics-free neurobasal medium in the first tube; and 2 µL Lipofectamine<sup>TM</sup> 2000 was mixed with 50 µL antibiotics-free neurobasal medium in a second tube. Then the diluted DNA and Lipofectamine<sup>TM</sup> 2000 were mixed gently and incubated for 20 min at room temperature (RT). The DNA-Lipofectamine<sup>TM</sup> 2000 complexes were gently added into culture well containing 500 µL antibiotics-free neurobasal medium. After the neurons were cultured at 37 °C for 6 h, the medium was replaced with normal culture medium. To determine the efficiency of cotransfection, neurons were immunostained with antibody against hPBEF 2 days after transfection.

## Supplemental Fig 1

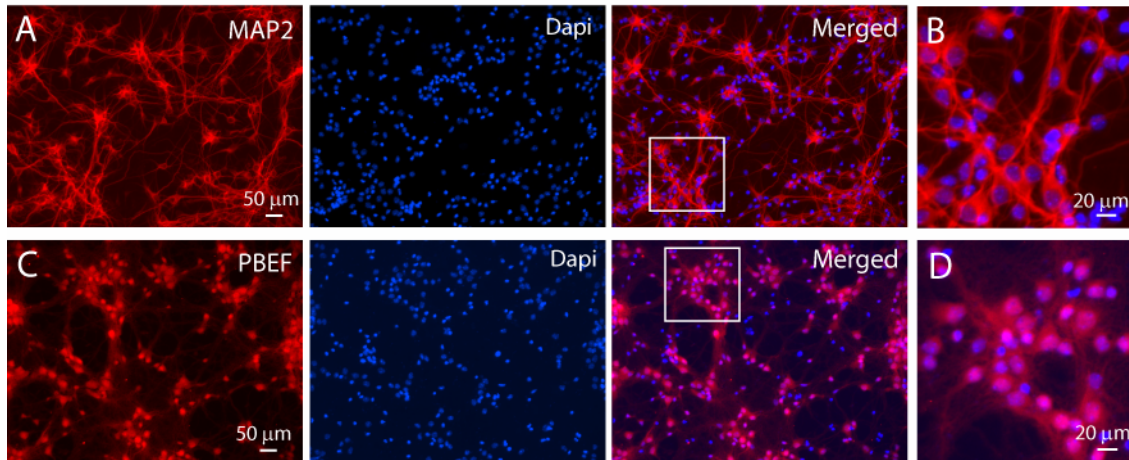

**Supplemental Fig 1. Expression of MAP2 and PBEF in cultured neurons.** Immunostaining for MAP2 (A) and PBEF (B) in cortical cultured neurons. Right panels are the high resolution images of the boxed regions in merged images.

## Supplemental Fig 2

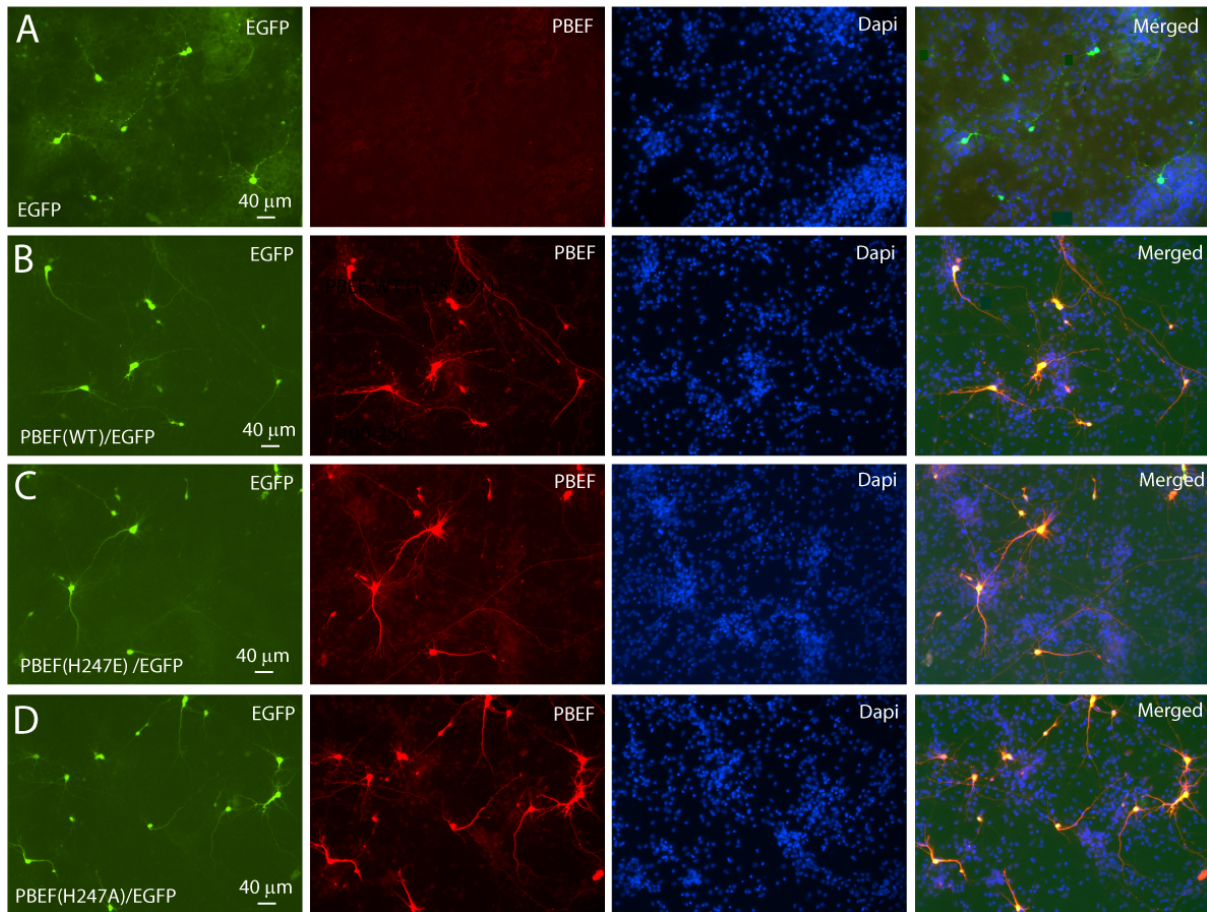

**Supplemental Fig 2. Co-transfection of neuronal cultures** (A) Epi-fluorescence images of PBEF and EGFP signals in neurons transfected by EGFP alone. Notice there is no EGFP+ cell that expresses enhanced PBEF. (B-D) Epi-fluorescence images of PBEF and EGFP signals in neurons cotransfected by WT hPBEF (B), H247E (C) and H247A (D) mutants with EGFP. Notice the enhanced PBEF expression levels of EGFP+ cells as compared with cells without transfection. Our data from 4-8 immunostaining experiments indicate 100% EGFP+ cells express enhanced WT and mutant hPBEF, therefore, EGFP can be considered to be a marker for PBEF overexpressing neurons after transfection. During imaging, we adjusted exposure time so that PBEF signals in non-transfected neurons are weak.

### Supplemental Fig 3

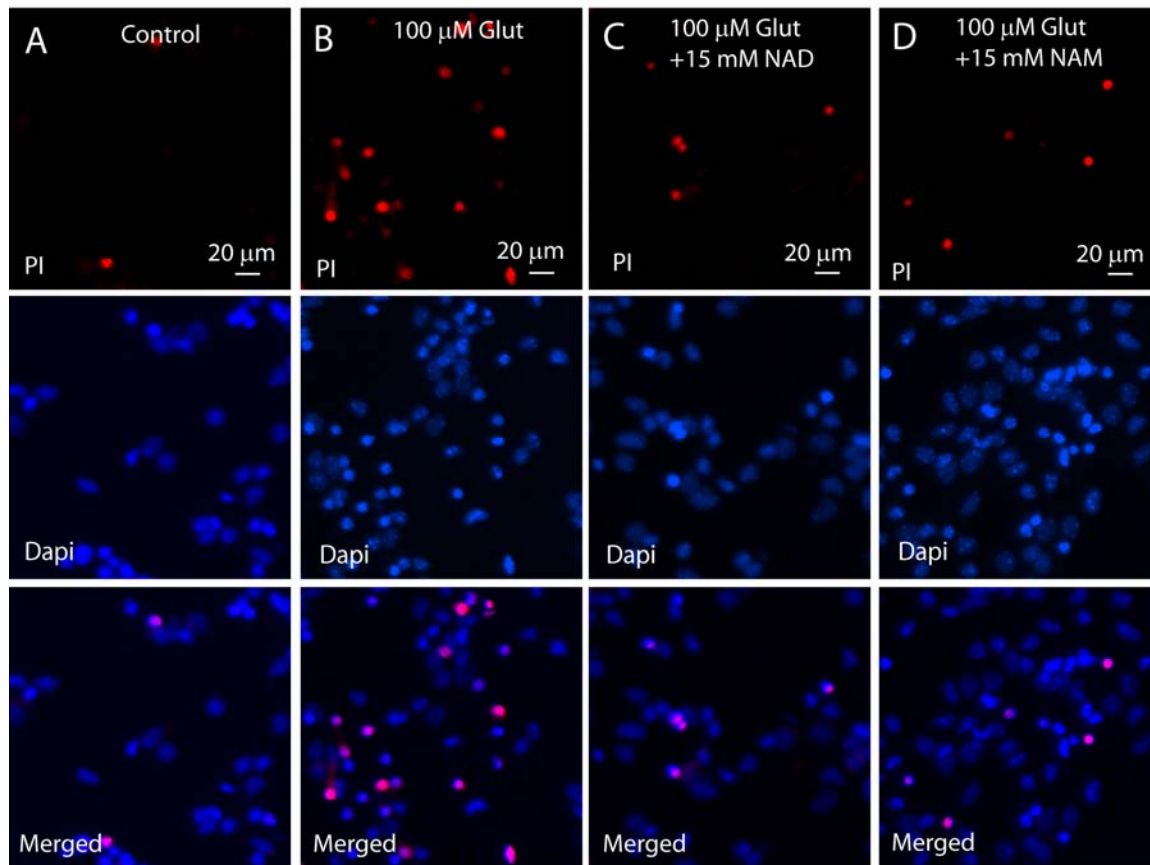

**Supplemental Fig 3.** Representative images of PI staining to determine neuronal death induced by glutamate excitotoxicity. A-D) Images of PI and Dapi staining of neurons under control condition (A), after glutamate stimulation in the absence (B) and the presence of 15 mM  $\text{NAD}^+$  (C) and 15 mM NAM (D).
